# Supplementary material
Source: PubMed Central journal article supplement (PMC3393438)
Supplement: supp_56.7.3508_SuppMaterial1.pdf [file supp_56.7.3508_SuppMaterial1.pdf]

**Table 1: Plaque diameters of HSV-1 and HSV-2 isolates and strains treated with AS and 838**

| HSV Strains       | VND             | AS-10 $\mu$ M   | AS-50 $\mu$ M   | 838-1 $\mu$ M   | 838-10 $\mu$ M  |
|-------------------|-----------------|-----------------|-----------------|-----------------|-----------------|
| HSV-1-clinical    | 0.50 $\pm$ 0.07 | 0.52 $\pm$ 0.07 | 0.30 $\pm$ 0.05 | 0.47 $\pm$ 0.08 | 0.30 $\pm$ 0.09 |
| HSV-1-luciferase  | 0.45 $\pm$ 0.05 | 0.40 $\pm$ 0.05 | 0.35 $\pm$ 0.03 | 0.40 $\pm$ 0.04 | 0.36 $\pm$ 0.04 |
| HSV2-clinical (2) | 0.67 $\pm$ 0.05 | 0.61 $\pm$ 0.03 | 0.62 $\pm$ 0.10 | 0.44 $\pm$ 0.03 | 0.39 $\pm$ 0.11 |
| HSV2-clinical (4) | 0.54 $\pm$ 0.04 | 0.56 $\pm$ 0.07 | 0.54 $\pm$ 0.08 | 0.45 $\pm$ 0.07 | 0.35 $\pm$ 0.07 |

Plaque diameters are shown in millimeter (mm). Mean values ( $\pm$ SD) of six determinations from two independent experiments are shown. VND- virus no drug

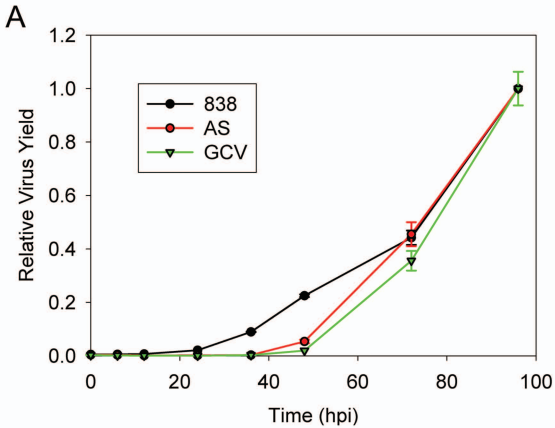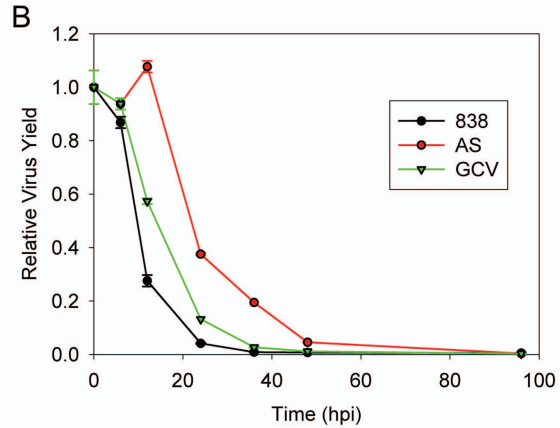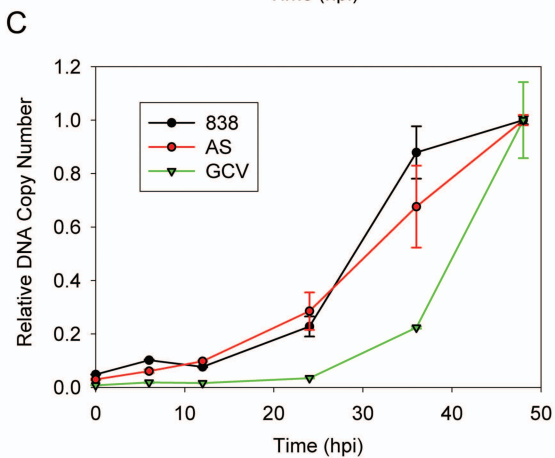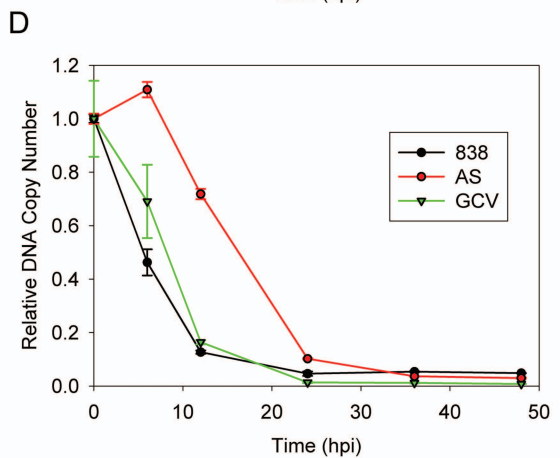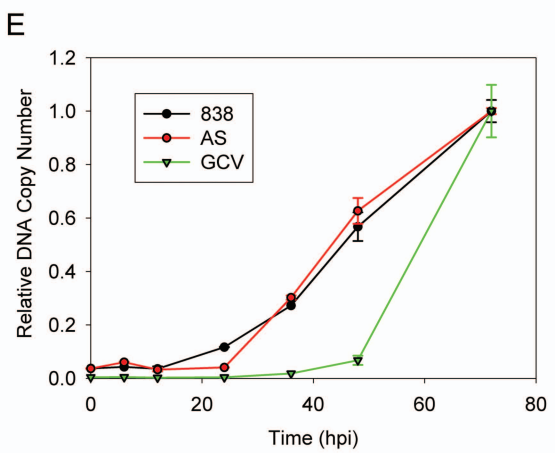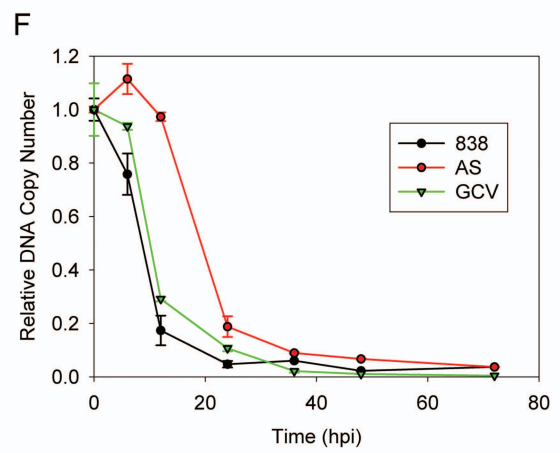

## **Supporting Information**

**Figure S1: Effects of add-on and removal of compounds on CMV DNA replication and virus yield.** Inhibition of virus yield by AS, 838 and GCV was measured by US 17 real-time PCR in supernatants collected at 96 hpi (A and B). Inhibition of viral DNA replication was measured by real-time PCR from purified cell and virus DNA collected at 48 hpi (C and D) and at 72 hpi (E and F), respectively. Compounds were added (A, C and E) or removed (B, D and F) at the indicated time points. Data represent mean values ( $\pm$ SD) of triplicate determinations from two independent experiments.
